# Supplementary material
Source: MDPI journal article supplement (https://www.mdpi.com/2073-4395/11/6/1123)
Supplement: s1 [file s1]

## Supplementary Materials

Table S1: Two-way analysis of variance of effects of *Polygonum perfoliatum* populations, seed dormancy release treatments and their interactions on final germination percentage

| Source                 | DF | SS        | MS       | F value | P Value              |
|------------------------|----|-----------|----------|---------|----------------------|
| <b>Populations (P)</b> | 2  | 17.49     | 8.74     | 0.36    | 0.6991 <sup>NS</sup> |
| <b>Treatments (T)</b>  | 6  | 103572.22 | 20714.44 | 852.06  | 0.0001*              |
| <b>P×T</b>             | 12 | 162.78    | 16.28    | 0.67    | 0.7488 <sup>NS</sup> |

DF = Degree of freedom, SS = Sum of squares, MS = Mean square, NS = Non-significant ( $p > 0.05$ ), \* = Significant ( $p \leq 0.05$ )

Table S2: Two-way analysis of variance of effects of *Polygonum perfoliatum* populations, light dark regimes and their interactions on final germination percentage

| Source                 | DF | SS      | MS      | F value | P Value              |
|------------------------|----|---------|---------|---------|----------------------|
| <b>Populations (P)</b> | 2  | 234.72  | 117.36  | 2.98    | 0.0676 <sup>NS</sup> |
| <b>Light/Dark (LD)</b> | 2  | 2955.55 | 1477.77 | 37.55   | 0.0001*              |
| <b>P×LD</b>            | 4  | 61.11   | 15.27   | 0.38    | 0.8151 <sup>NS</sup> |

DF = Degree of freedom, SS = Sum of squares, MS = Mean square, NS = Non-significant ( $p > 0.05$ ), \* = Significant ( $p \leq 0.05$ )

Table S3: Two-way analysis of variance of effects of *Polygonum perfoliatum* populations, constant temperatures and their interactions on final germination percentage

| Source                 | DF | SS        | MS       | F value | P Value |
|------------------------|----|-----------|----------|---------|---------|
| <b>Populations (P)</b> | 2  | 265.41    | 132.70   | 4.80    | 0.0104* |
| <b>Temperature (T)</b> | 9  | 108200.83 | 12022.31 | 434.97  | 0.0001* |
| <b>P×T</b>             | 18 | 1255.41   | 69.74    | 2.52    | 0.0022* |

DF = Degree of freedom, SS = Sum of squares, MS = Mean square, \* = Significant ( $p \leq 0.05$ )

Table S4: Two-way analysis of variance of effects of *Polygonum perfoliatum* populations, alternating temperatures and their interactions on final germination percentage

| Source                                      | DF | SS       | MS      | F value | P Value |
|---------------------------------------------|----|----------|---------|---------|---------|
| <b>Populations (P)</b>                      | 2  | 280.35   | 140.17  | 3.77    | 0.0282* |
| <b>Constant tempeartues (T<sub>c</sub>)</b> | 6  | 53097.61 | 8849.60 | 238.51  | 0.0001* |
| <b>P× T<sub>c</sub></b>                     | 12 | 1173.80  | 97.81   | 2.63    | 0.0064* |

DF = Degree of freedom, SS = Sum of squares, MS = Mean square, \* = Significant ( $p \leq 0.05$ )

Table S5: Two-way analysis of variance of effects of *Polygonum perfoliatum* populations, pH levels and their interactions on final germination percentage

| Source                 | DF | SS       | MS      | F value | P Value |
|------------------------|----|----------|---------|---------|---------|
| <b>Populations (P)</b> | 2  | 185.19   | 92.59   | 3.03    | 0.0538* |
| <b>pH</b>              | 8  | 55912.96 | 6989.12 | 228.73  | 0.0001* |
| <b>P×pH</b>            | 16 | 1414.81  | 88.43   | 2.89    | 0.0009* |

DF = Degree of freedom, SS = Sum of squares, MS = Mean square, \* = Significant ( $p \leq 0.05$ )

Table S6: Two-way analysis of variance of effects of *Polygonum perfoliatum* populations, salinity levels and their interactions on final germination percentage

| Source                     | DF | SS       | MS       | F value | P Value              |
|----------------------------|----|----------|----------|---------|----------------------|
| <b>Populations (P)</b>     | 2  | 585.19   | 292.59   | 20.39   | 0.0001*              |
| <b>Salinity levels (S)</b> | 8  | 86668.52 | 10833.56 | 754.85  | 0.0001*              |
| <b>P×S</b>                 | 16 | 260.65   | 16.29    | 1.14    | 0.3385 <sup>NS</sup> |

DF = Degree of freedom, SS = Sum of squares, MS = Mean square, NS = Non-significant ( $p > 0.05$ ), \* = Significant ( $p \leq 0.05$ )

Table S7: Two-way analysis of variance of effects of *Polygonum perfoliatum* populations, different osmotic potentials and their interactions on final germination percentage

| Source                        | DF | SS       | MS       | F value | P Value              |
|-------------------------------|----|----------|----------|---------|----------------------|
| <b>Populations (P)</b>        | 2  | 257.41   | 128.70   | 4.12    | 0.0198*              |
| <b>Osmotic Potentials (O)</b> | 8  | 98146.30 | 12268.29 | 392.59  | 0.0001*              |
| <b>P×O</b>                    | 16 | 184.26   | 11.52    | 0.37    | 0.9861 <sup>NS</sup> |

DF = Degree of freedom, SS = Sum of squares, MS = Mean square, NS = Non-significant ( $p > 0.05$ ), \* = Significant ( $p \leq 0.05$ )

Table S8: Two-way analysis of variance of effects of *Polygonum perfoliatum* populations, seed burial depths and their interactions on seedling emergence

| Source                        | DF | SS       | MS      | F value | P Value              |
|-------------------------------|----|----------|---------|---------|----------------------|
| <b>Populations (P)</b>        | 2  | 204.17   | 102.08  | 3.00    | 0.0533*              |
| <b>Seed burial Depths (D)</b> | 8  | 52058.33 | 6507.29 | 191.23  | 0.0001*              |
| <b>P×D</b>                    | 16 | 504.17   | 31.51   | 0.93    | 0.5433 <sup>NS</sup> |

DF = Degree of freedom, SS = Sum of squares, MS = Mean square, NS = Non-significant ( $p > 0.05$ ), \* = Significant ( $p \leq 0.05$ )
